# Supplementary material for: Clinical Importance of Regimens in Hepatic Arterial Infusion Chemotherapy for Advanced Hepatocellular Carcinoma with Macrovascular Invasion
Source: MDPI journal article supplement (doi:10.3390/cancers13174450), 2021-09-03
Supplement: s1 [file s1]

# Supplementary Materials: Clinical Importance of Regimens in Hepatic Arterial Infusion Chemotherapy for Advanced Hepatocellular Carcinoma with Macrovascular Invasion

Takashi Niizeki <sup>1</sup>, Hideki Iwamoto <sup>1,2,\*</sup>, Tomotake Shirono <sup>1</sup>, Shigeo Shimose <sup>1</sup>, Masahito Nakano <sup>1</sup>, Shusuke Okamura <sup>1</sup>, Yu Noda <sup>1</sup>, Naoki Kamachi <sup>1</sup>, Hiroyuki Suzuki <sup>1</sup>, Miwa Sakai <sup>1</sup>, Ryoko Kuromatsu <sup>1</sup>, Hironori Koga<sup>1</sup> and Takuji Torimura <sup>1</sup>

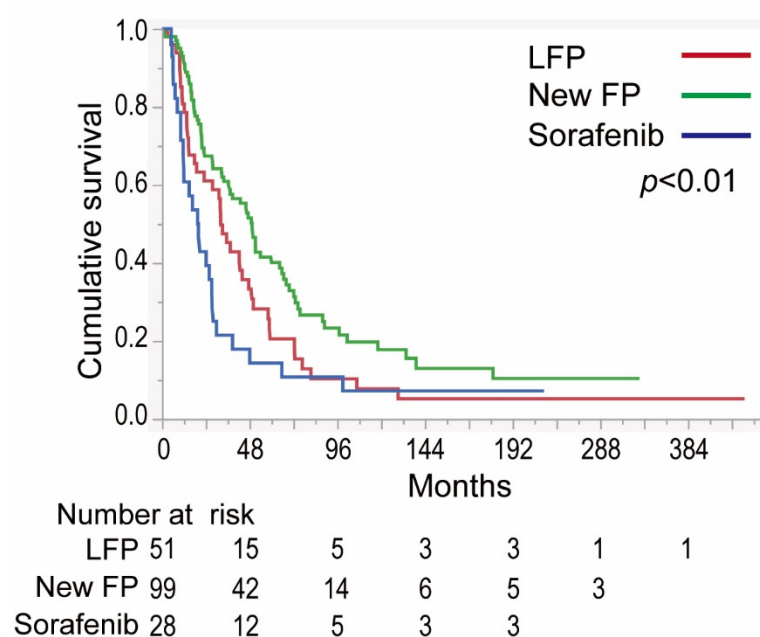

**Figure S1.** Comparison of the survival curve sorafenib, LFP and New FP groups. The MST of sorafenib was 9.7 months. The LFP group was 16.1 months. The MST of New FP was 24.7 months. There were significant differences between two groups ( $p < 0.01$ ).

**Table S1.** Patient and tumor characteristics of sorafenib group.

| Items                                         | Total (28)          |
|-----------------------------------------------|---------------------|
| Age                                           | 70.8 ± 9.9          |
| Sex (male/female)                             | 22/6                |
| Etiology (HBV */HCV **/NBNC ***/ HBV+HCV)     | 6/20/2/0            |
| Child-Pugh score (5/6)                        | 15/13               |
| WBC <sup>†</sup> (/μL)                        | 5294 ± 1652         |
| Plt <sup>††</sup> (×10 <sup>4</sup> /μL)      | 14.9 ± 6.8          |
| AFP <sup>†††</sup> (median) (ng/ml)           | 135.6 (1.9–720,500) |
| DCP <sup>‡</sup> (median) (mAU/ml)            | 2,397(14–75,000)    |
| Maximum tumor diameter (mm)                   | 63.9 ± 50.5         |
| Tumor number single / multiple                | 5/23                |
| Tumor occupancy (<3/≥3)                       | 71/79               |
| PVTT <sup>‡‡</sup> (trunk/ 1st or 2nd branch) | 7/18                |
| HVTT <sup>‡‡‡</sup> (present/ absent)         | 3/26                |
| BDTT <sup>§</sup> (present/ absent)           | 1/27                |

\* Hepatitis B virus, \*\* Hepatitis C virus, \*\*\* Alpha-phetoprotein, <sup>†</sup> Des-gamma-Carboxy Prothrombin, <sup>††</sup> Portal vein tumor thrombus, <sup>†††</sup> Alphaphetoprotein, <sup>‡</sup> Des-gamma-Carboxy Prothrombin, <sup>‡‡</sup> Portal vein tumor thrombosis, <sup>‡‡‡</sup> Hepatic vein tumor thrombosis, <sup>§</sup> Bile duct tumor thrombosis.

**Table S2.** Univariate and multivariate analysis of factors associate with poor survival in LFP.

| Items                                                | Uni Variate Analysis <i>p</i> -Value | Multivariate Analysis <i>p</i> -Value 95% CI |
|------------------------------------------------------|--------------------------------------|----------------------------------------------|
| Age ( $\geq 70$ years)                               | 0.525                                | -                                            |
| Gender (Male)                                        | 0.021                                | 0.470                                        |
| HBs * Antigen (+)                                    | 0.002                                | 0.603                                        |
| HCV ** Ab (-)                                        | 0.001                                | 0.057                                        |
| Child- Pugh score 6                                  | 0.213                                | -                                            |
| Platelet count ( $\geq 11 \times 10^4/\mu\text{L}$ ) | 0.004                                | 0.194                                        |
| AFP *** ( $\geq 400$ ng/mL)                          | 0.099                                | 0.855                                        |
| DCP <sup>+</sup> ( $\geq 1600$ mAU/mL)               | 0.011                                | 0.164                                        |
| Maximum tumor diameter ( $\geq 70$ mm)               | 0.003                                | 0.521                                        |
| Tumor located segments ( $\geq 3$ )                  | 0.355                                | -                                            |
| Grade of PVTT <sup>++</sup> (trunk)                  | <0.001                               | <0.001 (0.217–1.138)                         |
| Hepatic vein tumor thrombus (+)                      | 0.549                                | -                                            |

\* Hepatitis B virus, \*\* Hepatitis C virus, \*\*\* Alpha-phetoprotein, <sup>+</sup> Des-gamma-Carboxy Prothrombin, <sup>++</sup> Portal vein tumor thrombus.

**Table S3.** Univariate and multivariate analysis of factors associate with survival in New FP.

| Items                                                | Uni Variate Analysis <i>P</i> -Value | Multivariate Analysis <i>p</i> -Value 95% CI |
|------------------------------------------------------|--------------------------------------|----------------------------------------------|
| Age ( $\geq 70$ years)                               | 0.101                                | 0.667                                        |
| Gender (Male)                                        | 0.043                                | 0.470                                        |
| HBs * Antigen (+)                                    | 0.624                                | -                                            |
| HCV ** Ab (-)                                        | 0.969                                | -                                            |
| Child-Pugh score 6                                   | 0.075                                | 0.050                                        |
| Platelet count ( $\geq 11 \times 10^4/\mu\text{L}$ ) | 0.235                                | -                                            |
| AFP ( $\geq 400$ ng/mL)                              | 0.488                                | -                                            |
| DCP ( $\geq 1600$ mAU/mL)                            | 0.049                                | 0.121                                        |
| Maximum tumor diameter (70mm)                        | 0.724                                | 0.483                                        |
| Tumor located segments ( $\geq 3$ )                  | 0.004                                | 0.031 (0.538–0.26)                           |
| Grade of PVTT (trunk)                                | 0.171                                | -                                            |
| Hepatic vein tumor thrombus (+)                      | 0.011                                | 0.064                                        |

\* Hepatitis B virus, \*\* Hepatitis C virus.
